# Supplementary material for: The formation of carbamate ions in interstellar ice analogues
Source: Royal Society of Chemistry journal article supplement (doi:10.1039/c3cp53153h), 2013-10-16
Supplement: c3cp53153h.pdf [file c3cp53153h.pdf]

## The formation of carbamate ion in interstellar ice analogues

Yamilet Rodríguez-Lazcano, Belén Maté, Víctor J. Herrero, Rafael Escibano and Óscar Gálvez\*

*Instituto de Estructura de la Materia, IEM-CSIC, Serrano 123, 28006 Madrid, Spain*

(e-mail: oscar.galvez@csic.es)

\*corresponding author

### Supplementary information

## Contents

- **Figure S1.** Representation of the orthorhombic unit cell of the calculated crystal structure of Ammonium Carbamate.
- **Figure S2.** Equilibrium structures for different carbamate species. Distances are in Å.
- **Table S1.** Calculated (this work) and experimental lattice parameters (a, b, c in Å and volume in Å<sup>3</sup>), bond distances (Å) and angles (degrees) of crystalline Ammonium Carbamate.

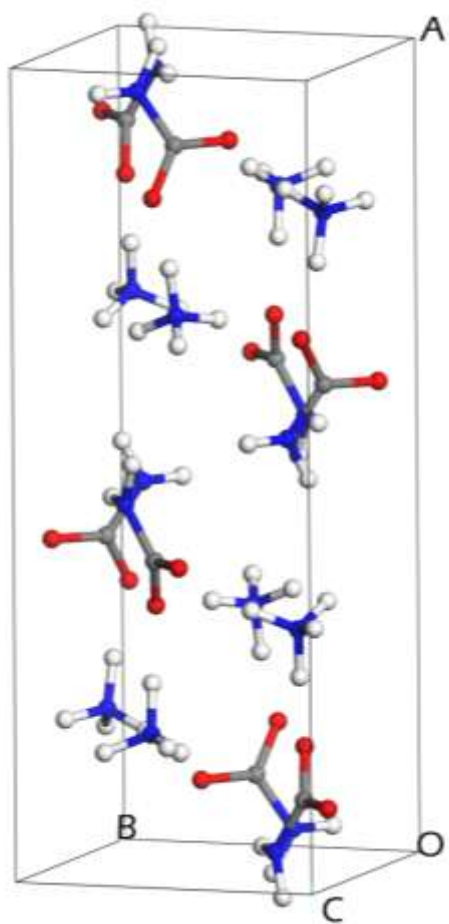

**Figure S1.**

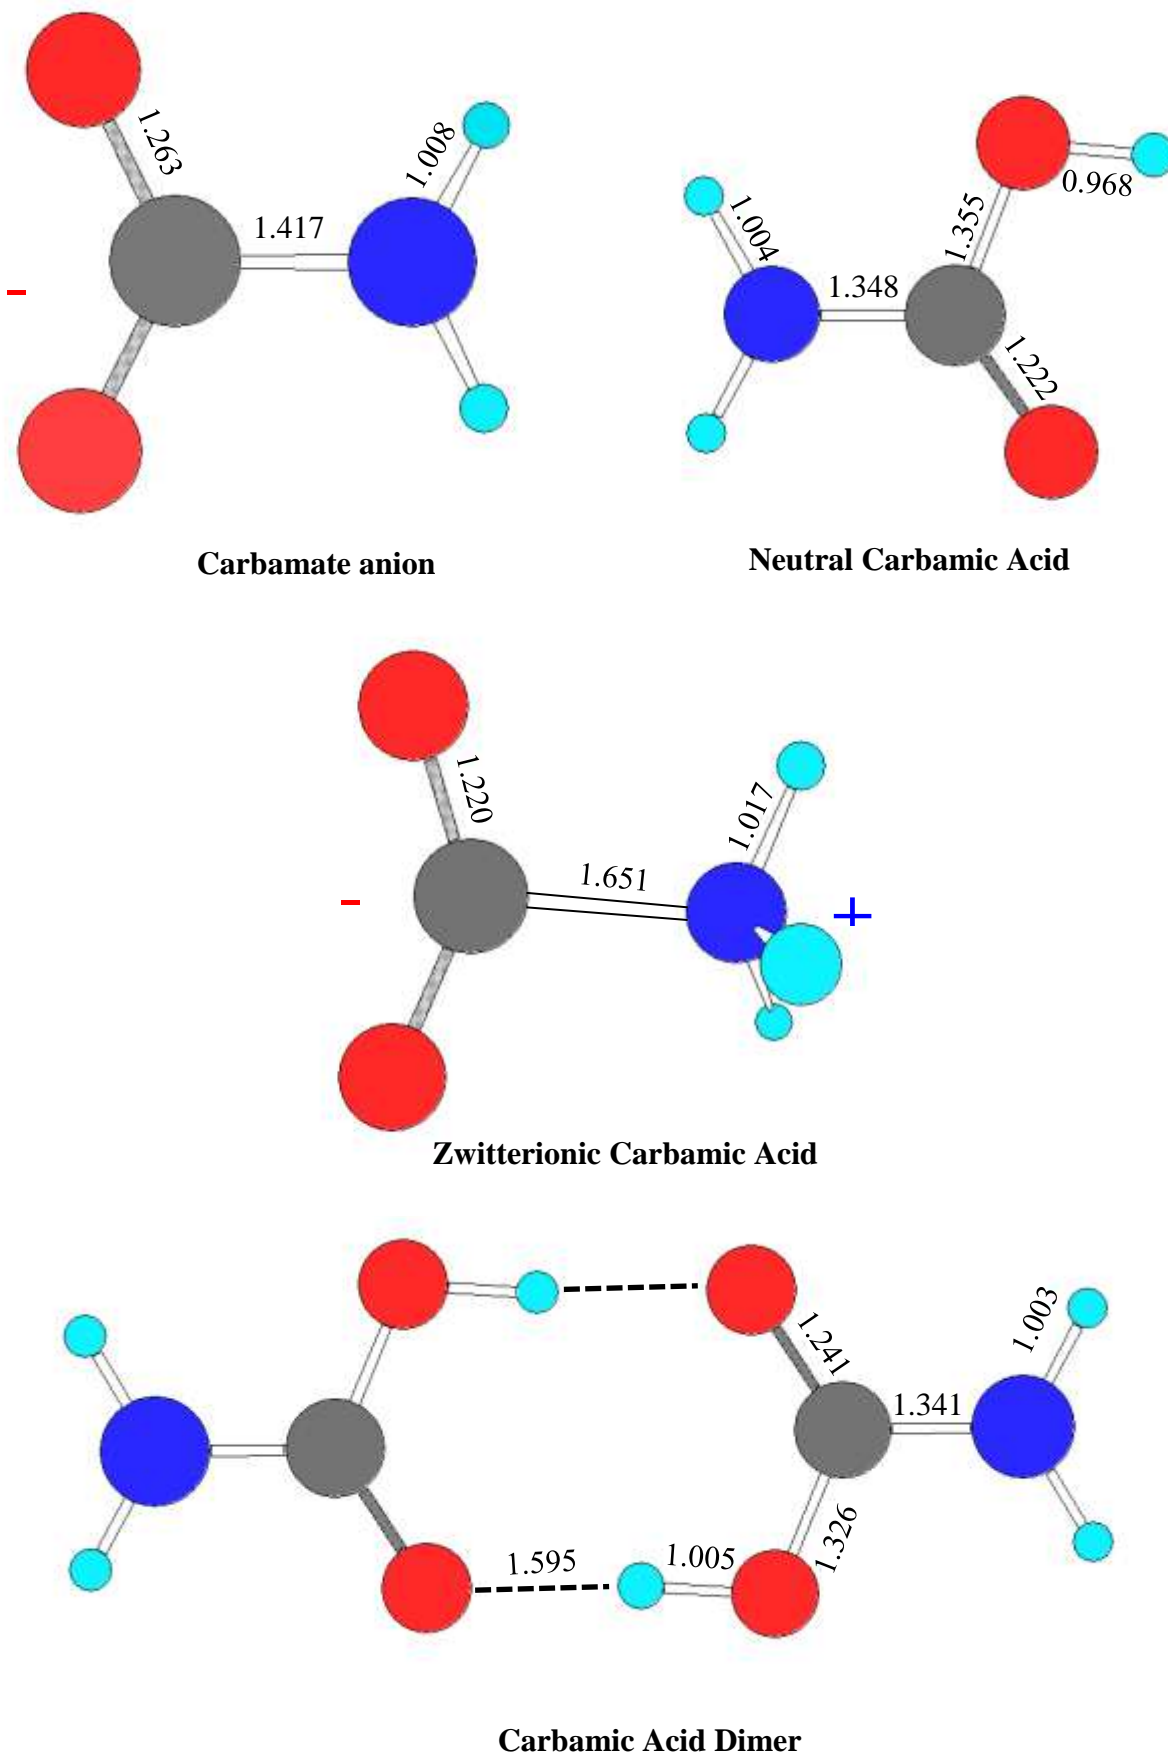

Figure S2.

**Table S1.** Calculated (this work) and experimental lattice parameters (a, b, c in Å and volume in Å<sup>3</sup>), bond distances (Å) and angles (degrees) of crystalline Ammonium Carbamate.

| Parameter                            | Theoretical <sup>a</sup> | Experimental <sup>b</sup> |
|--------------------------------------|--------------------------|---------------------------|
| a                                    |                          | 17.121(6)                 |
| b                                    |                          | 6.531(2)                  |
| c                                    |                          | 6.742(3)                  |
| Volume                               |                          | 753.955                   |
| <i>r</i> (C-O)                       | 1.290                    | 1.289(5)                  |
| <i>r</i> (C-O)                       | 1.280                    | 1.279(5)                  |
| <i>r</i> (N-H) <sub>carbamate</sub>  | 1.032                    | 0.86(5)                   |
| <i>r</i> (N-H) <sub>carbamate</sub>  | 1.017                    | 0.82(6)                   |
| $\beta$ (O-C-O)                      | 123.4                    | 123.5(3)                  |
| $\beta$ (O-C-N)                      | 118.5                    | 118.7(3)                  |
| $\beta$ (O-C-N)                      | 117.9                    | 117.9(3)                  |
| $\beta$ (H-N-H) <sub>carbamate</sub> | 118.8                    | 115(4)                    |
| $\beta$ (H-N-C)                      | 117.1                    | 120(3)                    |
| $\beta$ (H-N-C)                      | 119.8                    | 125(5)                    |
| <i>r</i> (N-H) <sub>ammonium</sub>   | 1.062                    | 0.99(5)                   |
| <i>r</i> (N-H) <sub>ammonium</sub>   | 1.047                    | 0.85(5)                   |
| <i>r</i> (N-H) <sub>ammonium</sub>   | 1.055                    | 0.91(5)                   |
| <i>r</i> (N-H) <sub>ammonium</sub>   | 1.040                    | 0.75(5)                   |
| $\beta$ (H-N-H) <sub>ammonium</sub>  | 111.4                    | 121(4)                    |
| $\beta$ (H-N-H) <sub>ammonium</sub>  | 107.4                    | 120(5)                    |
| $\beta$ (H-N-H) <sub>ammonium</sub>  | 108.7                    | 108(5)                    |
| $\beta$ (H-N-H) <sub>ammonium</sub>  | 110.3                    | 107(4)                    |
| $\beta$ (H-N-H) <sub>ammonium</sub>  | 111.7                    | 94(5)                     |
| <i>r</i> (O•••H) <sub>minimum</sub>  | 1.688                    | 1.77(5)                   |
| <i>r</i> (O•••H) <sub>maximum</sub>  | 1.910                    | 2.19(5)                   |

<sup>a</sup> PBE gradient-corrected functional (GGA). Cell parameters fixed to the experimental values.

<sup>b</sup> Ref. S1

## References

S1. J. M. Adams and R. W. Small. *Acta Cryst.*, 1973, **B29**, 2317.
